# Supplementary material
Source: PubMed Central journal article supplement (PMC7553236)
Supplement: mmc1.pdf [file mmc1.pdf]

1  
2  
3  
4  
5

## Supplementary Materials for

### **A CRISPR-Cas12a-based specific enhancer for more sensitive detection of SARS-CoV-2 infection**

## 6 Supplementary Figures

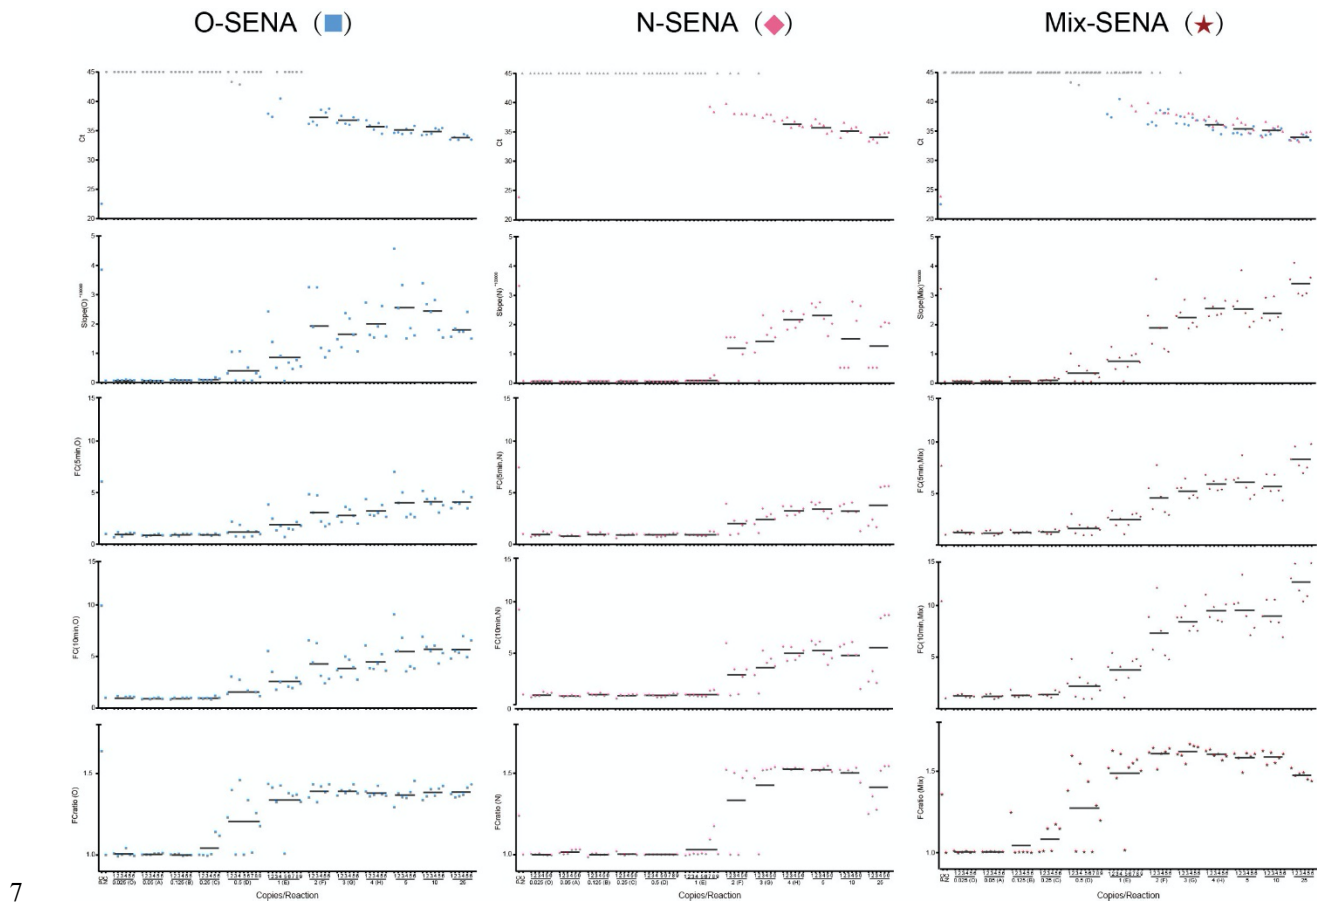

7  
 8 **Fig. 1.** Systematic titration of serially diluted SARS-CoV-2 standard RNA templates detected by  
 9 rRT-PCR followed by SENA. The design of this experiment is illustrated in detail in Materials  
 10 and Methods 4. All the resulted readouts are listed in Supplementary Table 2 and are plotted in  
 11 this figure for individual tests being numbered with each of the concentration of the templates used  
 12 as marked in the bottom X-axis. The very top horizontal row of the panel matrix is the test of rRT-  
 13 PCR with Ct values detected via fluorescence of FAM (● for *O* gene), VIC (▲ for *N* gene) and  
 14 both, respectively. In case  $Ct \geq 45$ , *i.e.*, no fluorescence signal of PCR amplification could be  
 15 detected, the corresponding symbols were shown in grey (● or ▲). The vertical lists from the  
 16 second row of the panel matrix represent the SENA reagent used for the detection: O-SENA (■),  
 17 N-SENA (◆) and mix-SENA (★). The parameters of SENA detection are shown from the second  
 18 top row to the bottom row as slope-5 min, FC-5 min, FC-10 min and FCratio-10 min/5 min

19 (abbreviated as *FCratio*), respectively and are all marked on their corresponding Y-axis. The rRT-  
20 PCR amplicons are all subject for NGS for verification (Supplementary Table 2).

21

22  
23

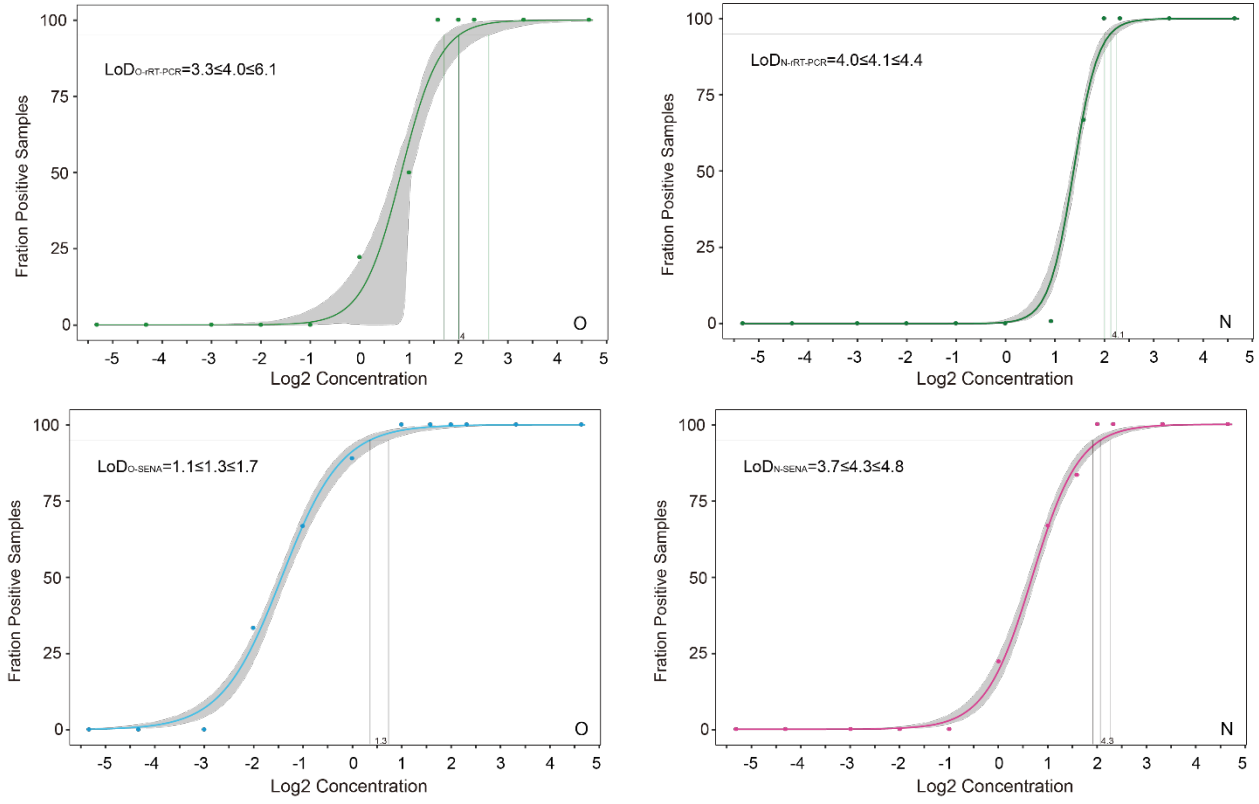

24

25 **Fig. 2.** Determination of the LoD values with 95% CI for both rRT-PCR (O-Ct and N-Ct, both  
26 green dots) and SENA (N-FCratio, pink dots; and O-FCratio, blue dots) based on the systematic  
27 titration (Materials and Methods 4.4). All the experimental and analytical details are described in  
28 the text.

29

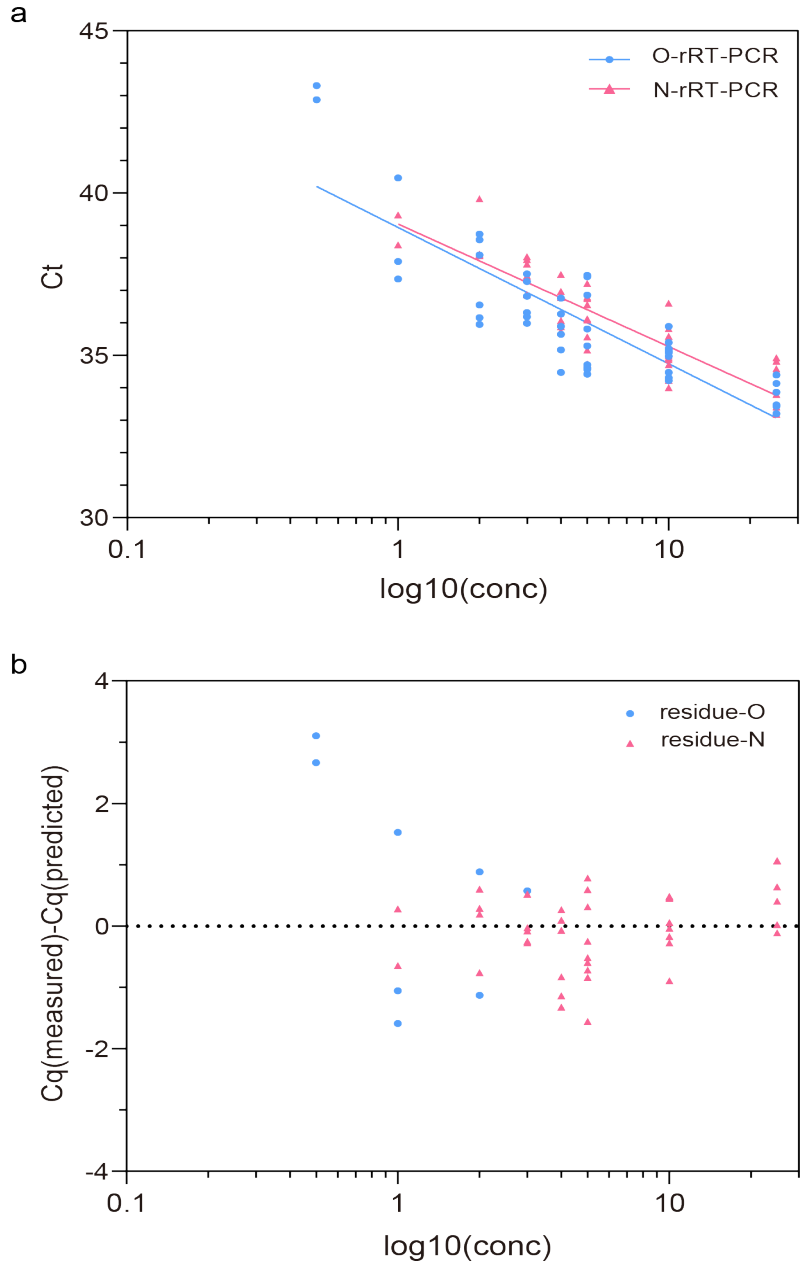

30

31 **Fig. 3.** Linear regression (a) of the Ct values (● for *O* gene and ▲ for *N* gene) corresponding to  
 32 the rRT-PCR titration experiment. The regression function for Ct (*O*) is:  $Y=38.94-4.198*\log(x)$   
 33 ( $R^2=0.7126$ ) and the regression function for Ct (*N*) is:  $Y=39.05-3.776*\log(x)$  ( $R^2=0.7662$ ), Panel  
 34 b is the residue plot for these two regressions.

35

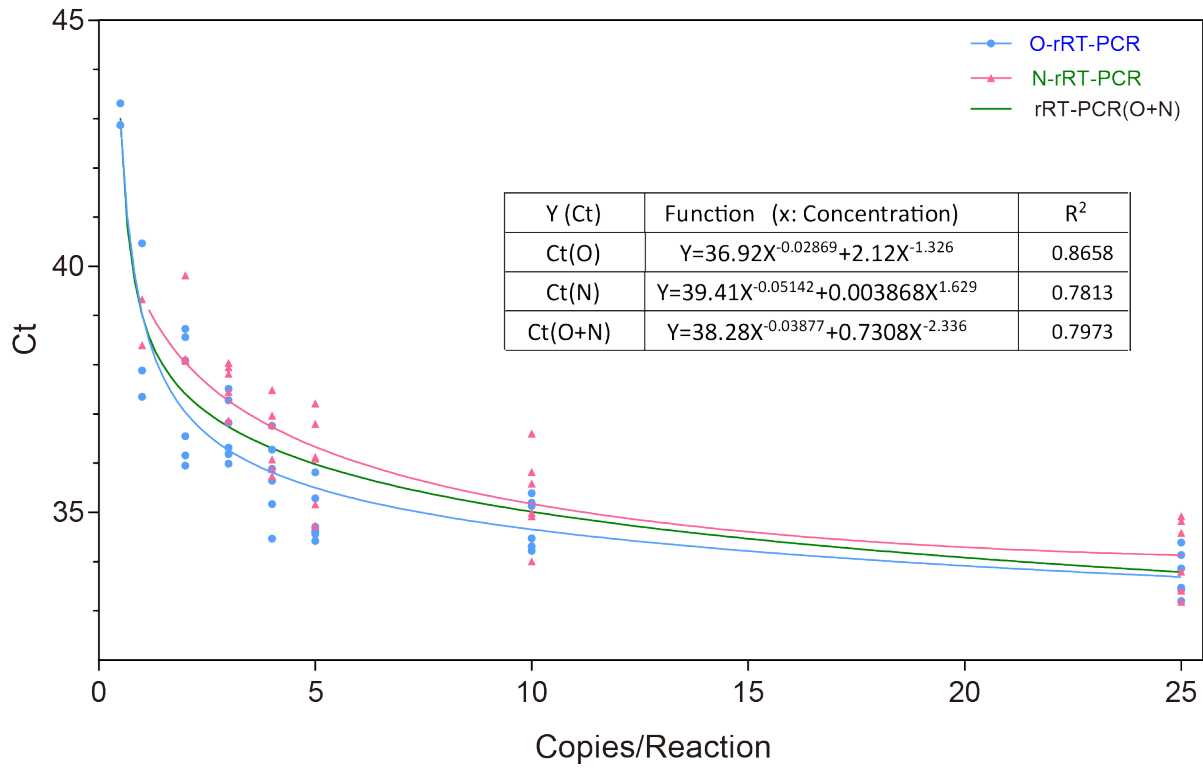

36  
 37  
 38  
 39  
 40  
 41

**Fig. 4.** Regression of rRT-PCR Ct-values with the concentration of the templates (copies/Rx). The data is from Supplementary Table 2. The regression functions for Ct-values of *O* gene (—), *N* gene (—) and both (—) (Functions 1) are illustrated as a table inside of the panel.

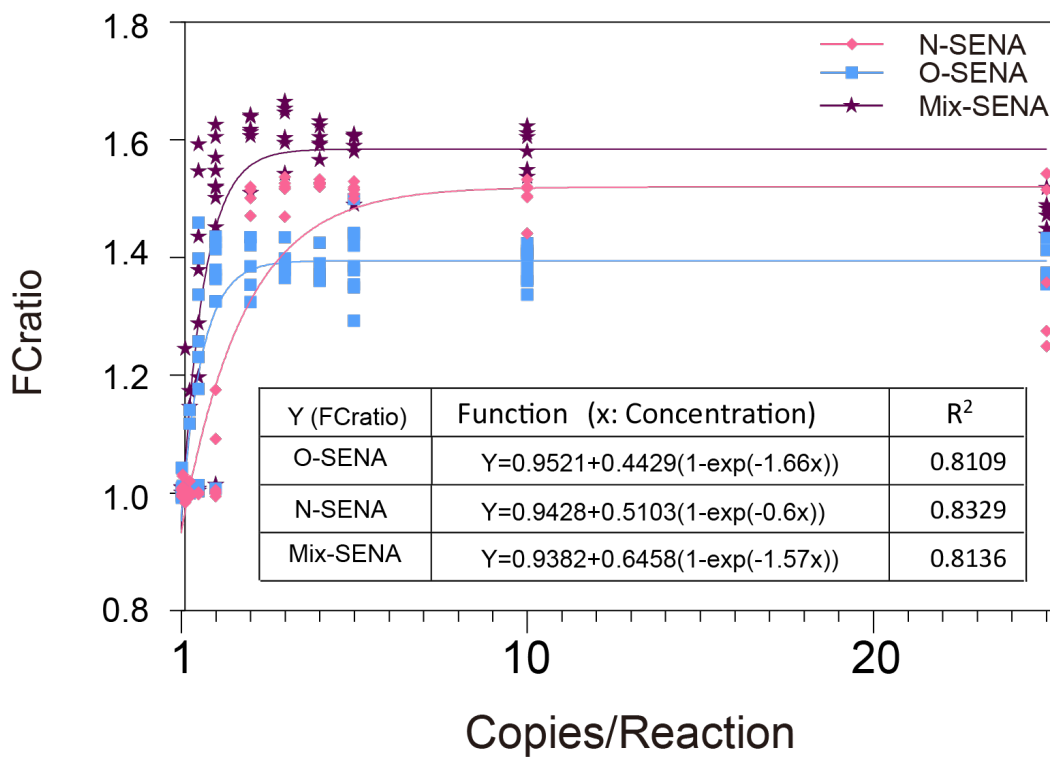

42  
43  
44  
45  
46  
47

**Fig. 5.** Regression of SENA *FCratio* with the concentration of the templates (copies/Rx). The data is from Supplementary Table 2. The regression functions for *FCratios* of O-SENA (—), N-SENA (—) and mix-SENA (—) (Functions 2) are illustrated as a table inside of the panel.

48

**Table 1a.** Summary of the commercial diagnostic kits used in the experiment

| <b>Kits</b> | <b>Target gene</b> | <b>Fluorescence channel</b> | <b>Cycles/Cut off</b> | <b>criteria for positive Interpretation (Ct)</b>                                                                   |
|-------------|--------------------|-----------------------------|-----------------------|--------------------------------------------------------------------------------------------------------------------|
| BG          | <i>O, N</i>        | FAM, VIC                    | 40/38                 | $O_{(Ct)} \leq 38$ and $N_{(Ct)} \leq 38$                                                                          |
| LR          | <i>O, N, E</i>     | FAM, HEX, TEXAS RED         | 45/43                 | $O_{(Ct)} \leq 43$ , and $N_{(Ct)} / E_{(Ct)} \leq 43$ (either $N_{(Ct)}$ or $E_{(Ct)}$ is equal or less than 43); |
| BGI         | <i>O</i>           | FAM                         | 40/38                 | $O_{(Ct)} \leq 38$                                                                                                 |

49

BG, BioGerm™; LR, Liferiver™; BGI, Beijing Genomics Institute.

50

51

52

53

**Table 1b.** Oligo nucleotide sequences of crRNA for SENA assay in this study

| <b>crRNA</b> | <b>Oligo nucleotide (5'-3')<sup>a</sup></b>                                        | <b>Target genes</b> | <b>Standards<sup>b</sup></b> |
|--------------|------------------------------------------------------------------------------------|---------------------|------------------------------|
| crRNA_LR_O4  | <i>TGTCTGATGTTGGTGATAGTGCGATCTACAAG</i><br><b>AGTAGAAATTCCTATAGTGAGTCGTATTA</b>    | <i>O</i>            | WHO (LR)                     |
| crRNA5.3.1   | <i>AGTGTAAGTACAGCAAGAAATACCACATCTACAAG</i><br><b>AGTAGAAATTCCTATAGTGAGTCGTATTA</b> | <i>E</i>            | WHO (LR)                     |
| FcrRNA3.7.1  | <i>GGAGTTGATCACAACTACAGCCAATCTACAAG</i><br><b>AGTAGAAATTCCTATAGTGAGTCGTATTA</b>    | <i>O</i>            | Chinese CDC (BG)             |
| FcrRNA6.7.1  | <i>CAATCTGTCAAGCAGCAGCAAAGATCTACAAG</i><br><b>AGTAGAAATTCCTATAGTGAGTCGTATTA</b>    | <i>N</i>            | Chinese CDC (BG)             |
| crRNA_BGI_O1 | <i>ACAGTTTGTGACTATCATCATCTACAAGA</i><br><b>GTAGAAATTCCTATAGTGAGTCGTATTA</b>        | <i>O</i>            | (BGI)                        |

54 **Note:**

55 <sup>a</sup>The nucleic acid sequences complementary to the guide sequences are shown in italic and the bold sequences were  
56 complementary to the direct repeats (DR) of LbCas12a crRNA. The underlined sequence was complementary to the  
57 T7 promoter, and thus, able to be aligned with the T7 promoter to initiate the T7 RNA polymerase catalyzed *in vitro*  
58 transcription to synthesize the designed crRNA.

59 <sup>b</sup>crRNAs prepared with the oligo nucleotides listed in this table specifically target the rRT-PCR amplified gene  
60 fragments of *O, E* or *N* in SARS-CoV-2, designed by the suppliers (labelled in the parenthesis) of individual  
61 commercial kits based on the standards of WHO, Chinese CDC or itself.

62

63



**Table 2a.** Original data of the titration experiment (Low template conc)

| Tests              |         | Ct    |    | N-SENA             |            |             |         | O-SENA             |            |             |         | mix-SENA           |            |             | NGS reads |        |         |
|--------------------|---------|-------|----|--------------------|------------|-------------|---------|--------------------|------------|-------------|---------|--------------------|------------|-------------|-----------|--------|---------|
| Conc               | Replica | O     | N  | Slope<br>(x100000) | FC<br>5min | FC<br>10min | FCratio | Slope<br>(x100000) | FC<br>5min | FC<br>10min | FCratio | Slope<br>(x100000) | FC<br>5min | FC<br>10min | FCratio   | Total  | Matched |
| 0.025<br>Copies/Rx | O1      | UD    | UD | 0.853              | 0.717      | 0.720       | 1.004   | 1.028              | 0.676      | 0.682       | 1.009   | 1.170              | 1.227      | 1.239       | 1.010     | /      | /       |
|                    | O2      | UD    | UD | 1.003              | 0.830      | 0.832       | 1.002   | 1.574              | 1.173      | 1.164       | 0.992   | 1.179              | 1.349      | 1.345       | 0.997     | /      | /       |
|                    | O3      | UD    | UD | 0.997              | 0.834      | 0.840       | 1.008   | 1.099              | 0.743      | 0.746       | 1.003   | 1.281              | 1.425      | 1.428       | 1.002     | /      | /       |
|                    | O4      | UD    | UD | 1.402              | 1.254      | 1.253       | 0.999   | 2.119              | 1.028      | 1.072       | 1.043   | 1.047              | 1.118      | 1.129       | 1.010     | /      | /       |
|                    | O5      | UD    | UD | 1.104              | 1.068      | 1.062       | 0.994   | 1.424              | 1.100      | 1.102       | 1.002   | 0.951              | 1.056      | 1.057       | 1.001     | /      | /       |
|                    | O6      | UD    | UD | 1.217              | 1.161      | 1.156       | 0.995   | 1.297              | 1.079      | 1.074       | 0.996   | 0.745              | 1.165      | 1.172       | 1.006     | /      | /       |
| 0.05<br>Copies/Rx  | A1      | UD    | UD | 1.139              | 0.863      | 0.871       | 1.010   | 1.240              | 0.857      | 0.858       | 1.002   | 1.015              | 1.116      | 1.120       | 1.004     | /      | /       |
|                    | A2      | UD    | UD | 0.905              | 0.744      | 0.746       | 1.002   | 1.001              | 0.744      | 0.746       | 1.003   | 1.264              | 1.390      | 1.397       | 1.005     | /      | /       |
|                    | A3      | UD    | UD | 1.115              | 0.834      | 0.837       | 1.005   | 1.137              | 0.858      | 0.859       | 1.001   | 1.282              | 1.434      | 1.444       | 1.007     | /      | /       |
|                    | A4      | UD    | UD | 0.882              | 0.905      | 0.931       | 1.029   | 0.839              | 0.928      | 0.936       | 1.008   | 0.896              | 0.920      | 0.926       | 1.006     | /      | /       |
|                    | A5      | UD    | UD | 0.769              | 0.795      | 0.820       | 1.031   | 0.864              | 1.016      | 1.025       | 1.009   | 0.907              | 1.041      | 1.045       | 1.004     | /      | /       |
|                    | A6      | UD    | UD | 0.781              | 0.781      | 0.805       | 1.032   | 0.807              | 0.873      | 0.883       | 1.012   | 1.100              | 1.215      | 1.223       | 1.006     | /      | /       |
| 0.125<br>Copies/Rx | B1      | UD    | UD | 0.068              | 1.138      | 1.120       | 0.984   | 0.086              | 0.835      | 0.838       | 1.004   | 0.215              | 1.465      | 1.825       | 1.246     | 243811 | 535     |
|                    | B2      | UD    | UD | 0.073              | 0.933      | 0.939       | 1.006   | 0.100              | 0.981      | 0.987       | 1.007   | 0.059              | 1.153      | 1.154       | 1.001     | 291449 | 0       |
|                    | B3      | UD    | UD | 0.072              | 0.884      | 0.891       | 1.008   | 0.067              | 0.772      | 0.778       | 1.007   | 0.056              | 1.118      | 1.121       | 1.003     | 359220 | 0       |
|                    | B4      | UD    | UD | 0.069              | 1.160      | 1.159       | 0.999   | 0.072              | 1.004      | 1.000       | 0.996   | 0.066              | 1.253      | 1.259       | 1.004     | 268425 | 0       |
|                    | B5      | UD    | UD | 0.058              | 0.862      | 0.862       | 1.000   | 0.067              | 1.005      | 1.003       | 0.997   | 0.072              | 1.289      | 1.294       | 1.004     | 271915 | 0       |
|                    | B6      | UD    | UD | 0.071              | 0.998      | 1.000       | 1.002   | 0.065              | 0.980      | 0.979       | 0.999   | 0.056              | 1.168      | 1.168       | 1.000     | 347723 | 0       |
| 0.25<br>Copies/Rx  | C1      | UD    | UD | 0.043              | 0.589      | 0.601       | 1.020   | 0.098              | 0.943      | 0.944       | 1.001   | 0.080              | 1.344      | 1.350       | 1.005     | 280487 | 0       |
|                    | C2      | UD    | UD | 0.092              | 0.941      | 0.943       | 1.002   | 0.070              | 0.899      | 0.898       | 0.999   | 0.072              | 1.331      | 1.343       | 1.009     | 327392 | 0       |
|                    | C3      | UD    | UD | 0.041              | 0.870      | 0.865       | 0.995   | 0.090              | 0.943      | 0.940       | 0.996   | 0.110              | 1.079      | 1.237       | 1.147     | 370753 | 570     |
|                    | C4      | UD    | UD | 0.058              | 0.954      | 0.956       | 1.002   | 0.070              | 0.828      | 0.833       | 1.005   | 0.067              | 1.048      | 1.059       | 1.011     | 313561 | 2       |
|                    | C5      | UD    | UD | 0.065              | 1.022      | 1.026       | 1.004   | 0.177              | 1.039      | 1.186       | 1.142   | 0.196              | 1.521      | 1.785       | 1.174     | 313109 | 59      |
|                    | C6      | UD    | UD | 0.075              | 0.968      | 0.966       | 0.998   | 0.132              | 0.890      | 0.995       | 1.118   | 0.155              | 1.386      | 1.591       | 1.148     | 332895 | 47      |
| 0.5<br>Copies/Rx   | D1      | UD    | UD | 0.068              | 0.931      | 0.929       | 0.998   | 0.315              | 1.108      | 1.365       | 1.231   | 0.401              | 1.767      | 2.438       | 1.380     | 360678 | 73      |
|                    | D2      | 43.31 | UD | 0.075              | 0.980      | 0.982       | 1.001   | 1.052              | 2.184      | 3.055       | 1.399   | 1.016              | 3.015      | 4.803       | 1.593     | 394441 | 54      |
|                    | D3      | UD    | UD | 0.049              | 0.903      | 0.903       | 1.001   | 0.061              | 0.765      | 0.767       | 1.003   | 0.064              | 1.153      | 1.162       | 1.008     | 289948 | 0       |

|           |    |       |       |       |       |       |       |       |       |       |       |       |       |        |       |        |      |
|-----------|----|-------|-------|-------|-------|-------|-------|-------|-------|-------|-------|-------|-------|--------|-------|--------|------|
|           | D4 | 42.87 | UD    | 0.041 | 0.713 | 0.714 | 1.001 | 1.069 | 1.878 | 2.741 | 1.460 | 0.595 | 1.951 | 3.017  | 1.547 | 313613 | 115  |
|           | D5 | UD    | UD    | 0.047 | 0.723 | 0.723 | 1.000 | 0.059 | 0.687 | 0.688 | 1.002 | 0.056 | 0.938 | 0.943  | 1.005 | 328563 | 0    |
|           | D6 | UD    | UD    | 0.051 | 0.787 | 0.788 | 1.001 | 0.511 | 1.259 | 1.683 | 1.337 | 0.436 | 1.719 | 2.468  | 1.436 | 372990 | 64   |
|           | D7 | UD    | UD    | 0.057 | 0.965 | 0.965 | 1.000 | 0.058 | 0.776 | 0.787 | 1.014 | 0.055 | 0.944 | 0.948  | 1.005 | 333039 | 0    |
|           | D8 | UD    | UD    | 0.070 | 1.085 | 1.083 | 0.998 | 0.317 | 1.230 | 1.548 | 1.258 | 0.314 | 1.765 | 2.274  | 1.288 | 360707 | 153  |
|           | D9 | UD    | UD    | 0.068 | 1.068 | 1.068 | 1.000 | 0.190 | 0.984 | 1.159 | 1.177 | 0.201 | 1.477 | 1.768  | 1.197 | 212757 | 113  |
|           | E1 | 37.89 | UD    | 0.076 | 0.979 | 0.974 | 0.994 | 2.426 | 3.844 | 5.520 | 1.436 | 0.803 | 2.659 | 4.041  | 1.520 | 269723 | 217  |
|           | E2 | 37.35 | UD    | 0.064 | 0.884 | 0.884 | 1.000 | 1.386 | 2.478 | 3.505 | 1.414 | 1.245 | 3.318 | 5.395  | 1.626 | 457749 | 219  |
|           | E3 | UD    | UD    | 0.066 | 0.906 | 0.911 | 1.005 | 0.502 | 1.338 | 1.773 | 1.325 | 0.489 | 1.906 | 2.777  | 1.458 | 369267 | 69   |
|           | E4 | 40.47 | UD    | 0.053 | 0.822 | 0.824 | 1.002 | 0.907 | 1.759 | 2.509 | 1.426 | 0.875 | 2.524 | 4.051  | 1.605 | 238968 | 294  |
| 1         | E5 | UD    | UD    | 0.064 | 0.799 | 0.805 | 1.007 | 0.049 | 0.704 | 0.710 | 1.008 | 0.069 | 1.055 | 1.071  | 1.015 | 317126 | 4    |
| Copies/Rx | E6 | UD    | UD    | 0.057 | 0.789 | 0.791 | 1.003 | 0.682 | 1.506 | 2.077 | 1.379 | 0.561 | 1.962 | 2.985  | 1.522 | 252167 | 172  |
|           | E7 | UD    | 39.33 | 0.171 | 1.255 | 1.370 | 1.092 | 0.466 | 1.425 | 1.943 | 1.364 | 0.948 | 2.977 | 4.608  | 1.548 | 94314  | 649  |
|           | E8 | UD    | 38.40 | 0.272 | 1.218 | 1.431 | 1.175 | 0.772 | 2.145 | 2.940 | 1.371 | 1.001 | 3.061 | 4.807  | 1.570 | 345634 | 1183 |
|           | E9 | UD    | UD    | 0.063 | 0.958 | 0.960 | 1.003 | 0.551 | 1.784 | 2.366 | 1.326 | 0.721 | 2.735 | 4.108  | 1.502 | 296593 | 383  |
|           | F1 | 36.16 | 39.82 | 1.566 | 3.926 | 5.968 | 1.520 | 3.253 | 4.850 | 6.565 | 1.354 | 2.309 | 5.504 | 8.881  | 1.614 | 59563  | 173  |
|           | F2 | 36.55 | UD    | 1.566 | 0.906 | 0.906 | 1.000 | 1.889 | 3.074 | 4.408 | 1.434 | 1.353 | 3.482 | 5.716  | 1.642 | 3736   | 116  |
| 2         | F3 | 35.95 | 38.12 | 1.566 | 2.287 | 3.434 | 1.501 | 3.251 | 4.742 | 6.279 | 1.324 | 3.554 | 7.748 | 11.703 | 1.510 | 334475 | 0    |
| Copies/Rx | F4 | 38.56 | UD    | 0.078 | 1.027 | 1.026 | 0.998 | 1.182 | 2.199 | 3.125 | 1.421 | 1.885 | 4.694 | 7.546  | 1.607 | 257994 | 0    |
|           | F5 | 38.09 | 38.08 | 0.989 | 1.842 | 2.710 | 1.471 | 0.864 | 1.729 | 2.396 | 1.386 | 1.175 | 3.195 | 5.169  | 1.618 | 243367 | 418  |
|           | F6 | 38.73 | 38.07 | 1.375 | 2.261 | 3.427 | 1.515 | 1.079 | 1.972 | 2.828 | 1.434 | 1.076 | 2.910 | 4.772  | 1.640 | 253600 | 148  |
|           | G1 | 36.32 | 37.82 | 1.046 | 1.955 | 2.874 | 1.470 | 1.476 | 2.678 | 3.657 | 1.365 | 2.295 | 5.505 | 8.828  | 1.604 | /      | /    |
|           | G2 | 37.51 | UD    | 0.077 | 1.089 | 1.091 | 1.002 | 1.204 | 2.146 | 3.001 | 1.399 | 2.416 | 5.537 | 8.834  | 1.596 | /      | /    |
| 3         | G3 | 36.19 | 37.45 | 2.320 | 3.467 | 5.261 | 1.517 | 2.370 | 3.623 | 5.003 | 1.381 | 2.856 | 6.450 | 9.951  | 1.543 | /      | /    |
| Copies/Rx | G4 | 35.99 | 38.04 | 1.649 | 2.674 | 4.066 | 1.521 | 2.182 | 3.353 | 4.680 | 1.396 | 1.869 | 4.530 | 7.544  | 1.665 | /      | /    |
|           | G5 | 37.28 | 37.95 | 1.884 | 2.929 | 4.469 | 1.526 | 1.632 | 2.766 | 3.968 | 1.434 | 2.061 | 4.830 | 7.988  | 1.654 | /      | /    |
|           | G6 | 36.82 | 36.87 | 1.566 | 2.434 | 3.742 | 1.537 | 1.068 | 1.993 | 2.749 | 1.379 | 1.933 | 4.580 | 7.544  | 1.647 | /      | /    |
|           | H1 | 36.76 | 36.97 | 2.458 | 3.687 | 5.634 | 1.528 | 2.730 | 4.359 | 6.059 | 1.390 | 2.904 | 6.800 | 11.041 | 1.624 | /      | /    |
|           | H2 | 35.89 | 37.49 | 1.826 | 2.780 | 4.245 | 1.527 | 1.629 | 2.830 | 3.850 | 1.361 | 2.291 | 5.442 | 8.883  | 1.632 | /      | /    |
| 4         | H3 | 35.17 | 35.74 | 2.455 | 3.681 | 5.597 | 1.520 | 1.538 | 2.774 | 3.799 | 1.369 | 2.616 | 6.185 | 9.861  | 1.594 | /      | /    |
| Copies/Rx | H4 | 36.28 | 36.78 | 1.893 | 2.832 | 4.340 | 1.533 | 1.916 | 3.021 | 4.305 | 1.425 | 2.332 | 5.328 | 8.553  | 1.605 | /      | /    |
|           | H5 | 34.47 | 36.08 | 2.095 | 3.103 | 4.735 | 1.526 | 2.614 | 3.803 | 5.219 | 1.372 | 2.370 | 5.383 | 8.432  | 1.567 | /      | /    |

|   |           |       |       |       |       |       |       |       |       |       |       |       |       |        |       |       |   |   |
|---|-----------|-------|-------|-------|-------|-------|-------|-------|-------|-------|-------|-------|-------|--------|-------|-------|---|---|
|   | H6        | 35.65 | 35.88 | 2.349 | 3.443 | 5.248 | 1.524 | 1.580 | 2.665 | 3.633 | 1.363 | 2.817 | 6.343 | 10.098 | 1.592 | /     | / |   |
|   | I1        | 34.61 | 36.13 | 2.720 | 4.079 | 6.185 | 1.516 | 4.567 | 7.015 | 9.071 | 1.293 | 2.631 | 6.312 | 10.145 | 1.607 | /     | / |   |
|   | I2        | 34.71 | 37.22 | 2.589 | 3.831 | 5.823 | 1.520 | 2.537 | 4.017 | 5.538 | 1.379 | 2.805 | 6.481 | 10.243 | 1.580 | /     | / |   |
|   | I3        | 34.42 | 36.46 | 2.759 | 4.047 | 6.133 | 1.515 | 3.327 | 5.023 | 6.806 | 1.355 | 3.858 | 8.710 | 12.980 | 1.490 | /     | / |   |
| 5 | Copies/Rx | I4    | 35.29 | 36.09 | 2.196 | 3.205 | 4.903 | 1.530 | 1.503 | 2.635 | 3.556 | 1.350 | 2.395 | 5.572  | 8.967 | 1.609 | / | / |
|   | I5        | 34.57 | 34.73 | 1.607 | 2.499 | 3.860 | 1.545 | 1.852 | 2.908 | 4.030 | 1.386 | 1.922 | 4.474 | 7.115  | 1.590 | /     | / |   |
|   | I6        | 35.81 | 35.16 | 2.029 | 2.992 | 4.512 | 1.508 | 1.610 | 2.629 | 3.825 | 1.455 | 2.106 | 4.870 | 7.825  | 1.607 | /     | / |   |

---

**Note:** UD, undetected. /, PCR product was not analyzed by NGS.

65  
66  
67  
68  
69  
70  
71  
72  
73  
74  
75  
76  
77  
78  
79  
80  
81  
82  
83  
84  
85  
86

87

88

**Table 2b.** Original data of the titration experiment (High template conc)

| Tests           |         | Ct    |       | N-SENA             |            |             |         | O-SENA             |            |             |         | mix-SENA           |            |             | NGS reads |       |         |
|-----------------|---------|-------|-------|--------------------|------------|-------------|---------|--------------------|------------|-------------|---------|--------------------|------------|-------------|-----------|-------|---------|
| Conc            | Replica | O     | N     | Slope<br>(x100000) | FC<br>5min | FC<br>10min | FCratio | Slope<br>(x100000) | FC<br>5min | FC<br>10min | FCratio | Slope<br>(x100000) | FC<br>5min | FC<br>10min | FCratio   | Total | Matched |
| 10<br>Copies/Rx | J1      | 34.23 | 34.01 | 0.528              | 3.700      | 5.625       | 1.520   | 3.394              | 5.168      | 6.910       | 1.337   | 2.232              | 5.499      | 8.931       | 1.624     | /     | /       |
|                 | J2      | 34.31 | 36.61 | 0.528              | 3.898      | 5.857       | 1.503   | 2.679              | 4.355      | 5.923       | 1.360   | 2.921              | 6.863      | 10.553      | 1.538     | /     | /       |
|                 | J3      | 34.47 | 34.99 | 0.528              | 3.163      | 4.802       | 1.518   | 2.412              | 3.913      | 5.495       | 1.404   | 2.146              | 5.230      | 8.432       | 1.612     | /     | /       |
|                 | J4      | 35.39 | 35.59 | 2.785              | 4.042      | 6.083       | 1.505   | 2.817              | 4.434      | 6.047       | 1.364   | 2.966              | 6.814      | 10.559      | 1.550     | /     | /       |
|                 | J5      | 35.14 | 35.82 | 2.130              | 3.131      | 4.801       | 1.533   | 1.794              | 3.069      | 4.321       | 1.408   | 2.258              | 5.290      | 8.360       | 1.580     | /     | /       |
|                 | J6      | 35.45 | 34.92 | 2.637              | 1.273      | 1.526       | 1.442   | 1.539              | 3.772      | 5.327       | 1.424   | 1.834              | 4.311      | 6.923       | 1.606     | /     | /       |
| 25<br>Copies/Rx | H1      | 33.47 | 33.42 | 0.528              | 1.798      | 2.247       | 1.250   | 1.560              | 3.491      | 4.798       | 1.374   | 3.551              | 8.312      | 12.625      | 1.519     | /     | /       |
|                 | H2      | 33.86 | 33.80 | 0.528              | 2.398      | 3.256       | 1.358   | 1.842              | 4.055      | 5.493       | 1.355   | 4.112              | 9.547      | 14.051      | 1.472     | /     | /       |
|                 | H3      | 33.43 | 33.19 | 0.528              | 1.655      | 2.111       | 1.276   | 1.738              | 3.922      | 5.339       | 1.361   | 3.062              | 7.712      | 11.442      | 1.484     | /     | /       |
|                 | H4      | 34.39 | 34.59 | 1.930              | 5.532      | 8.381       | 1.515   | 1.738              | 5.083      | 6.964       | 1.370   | 2.991              | 6.980      | 10.400      | 1.490     | /     | /       |
|                 | H5      | 34.14 | 34.82 | 2.073              | 5.624      | 8.676       | 1.543   | 2.412              | 3.485      | 4.925       | 1.413   | 3.071              | 7.517      | 10.900      | 1.450     | /     | /       |
|                 | H6      | 33.45 | 34.92 | 2.047              | 5.634      | 8.693       | 1.543   | 1.502              | 4.567      | 6.548       | 1.434   | 3.605              | 9.792      | 14.100      | 1.440     | /     | /       |

89

**Note:** /, PCR product was not analyzed by NGS.

90  
91  
92

**Table 3.** Comparison of SARS-CoV-2 measurement on clinical specimens by rRT-PCR and SENA

| Patient No. | Specimens          | Clinical features |                    | Kit | qPCR         |              |              |                | SENA          |                | NG S | Final outcome       | Sample origin |
|-------------|--------------------|-------------------|--------------------|-----|--------------|--------------|--------------|----------------|---------------|----------------|------|---------------------|---------------|
|             |                    | Symptoms          | Diagnosis          |     | Ct Value (E) | Ct Value (O) | Ct Value (N) | Interpretation | FCratio Value | Interpretation |      |                     |               |
| P001        | Oropharyngeal swab | Fever, cough      | COVID-19 suspected | BG  | N/A          | 29.55        | 29.47        | +              | 1.584         | +              | /    | Consistent Positive | SZII          |
| P002        | Oropharyngeal swab | Fever, cough      | COVID-19 suspected | BG  | N/A          | 26.91        | 27.04        | +              | 1.640         | +              | /    | Consistent Positive | SZII          |
| P003        | Oropharyngeal swab | Fever, cough      | COVID-19 suspected | BG  | N/A          | 33.77        | 33.88        | +              | 1.570         | +              | /    | Consistent Positive | SZII          |
| P004        | Oropharyngeal swab | Fever, cough      | COVID-19 suspected | BG  | N/A          | 33.47        | 33.46        | +              | 1.587         | +              | /    | Consistent Positive | SZII          |
| P005        | Oropharyngeal swab | Fever, cough      | COVID-19 suspected | BG  | N/A          | 33.83        | 34.24        | +              | 1.553         | +              | /    | Consistent Positive | SZII          |
| P006        | Oropharyngeal swab | Fever, cough      | COVID-19 suspected | BG  | N/A          | 32.6         | 32.4         | +              | 1.589         | +              | /    | Consistent Positive | SZII          |
| P007        | Oropharyngeal swab | Fever, cough      | COVID-19 suspected | BG  | N/A          | 33.72        | 34.47        | +              | 1.550         | +              | /    | Consistent Positive | SZII          |
| P008        | Oropharyngeal swab | Fever, cough      | COVID-19 suspected | BG  | N/A          | 30.13        | 29.73        | +              | 1.578         | +              | /    | Consistent Positive | SZII          |
| P009        | Oropharyngeal swab | Fever, cough      | COVID-19 suspected | BG  | N/A          | 34.75        | 34.81        | +              | 1.535         | +              | /    | Consistent Positive | SZII          |
| P010        | Oropharyngeal swab | Fever, cough      | COVID-19 suspected | BG  | N/A          | 30.54        | 30.72        | +              | 1.617         | +              | /    | Consistent Positive | SZII          |
| P011        | Oropharyngeal swab | Asymptomatic      | Close contacts     | BG  | N/A          | >40          | >40          | -              | 1.003         | -              | /    | Consistent Negative | SZII          |
| P012        | Oropharyngeal swab | Asymptomatic      | Close contacts     | BG  | N/A          | >40          | >40          | -              | 0.995         | -              | /    | Consistent Negative | SZII          |
| P013        | Oropharyngeal swab | Asymptomatic      | Close contacts     | BG  | N/A          | >40          | >40          | -              | 0.998         | -              | /    | Consistent Negative | SZII          |
| P014        | Oropharyngeal swab | Asymptomatic      | Close contacts     | BG  | N/A          | >40          | >40          | -              | 1.000         | -              | /    | Consistent Negative | SZII          |
| P015        | Oropharyngeal swab | Asymptomatic      | Close contacts     | BG  | N/A          | >40          | >40          | -              | 0.996         | -              | /    | Consistent Negative | SZII          |
| P016        | Oropharyngeal swab | Asymptomatic      | Close contacts     | BG  | N/A          | >40          | >40          | -              | 0.995         | -              | /    | Consistent Negative | SZII          |

|      |                    |                |                    |    |     |       |       |   |       |   |   |                        |      |
|------|--------------------|----------------|--------------------|----|-----|-------|-------|---|-------|---|---|------------------------|------|
| P017 | Oropharyngeal swab | Asymptomatic   | Close contacts     | BG | N/A | >40   | >40   | - | 0.993 | - | / | Consistent<br>Negative | SZII |
| P018 | Oropharyngeal swab | Asymptomatic   | Close contacts     | BG | N/A | >40   | >40   | - | 1.003 | - | / | Consistent<br>Negative | SZII |
| P019 | Oropharyngeal swab | Asymptomatic   | Close contacts     | BG | N/A | >40   | >40   | - | 0.995 | - | / | Consistent<br>Negative | SZII |
| P020 | Oropharyngeal swab | Asymptomatic   | Close contacts     | BG | N/A | >40   | >40   | - | 0.999 | - | / | Consistent<br>Negative | SZII |
| P021 | Oropharyngeal swab | Asymptomatic   | Close contacts     | BG | N/A | >40   | >40   | - | 0.995 | - | / | Consistent<br>Negative | SZII |
| P022 | Oropharyngeal swab | Asymptomatic   | Close contacts     | BG | N/A | >40   | >40   | - | 0.997 | - | / | Consistent<br>Negative | SZII |
| P023 | Oropharyngeal swab | Asymptomatic   | Close contacts     | BG | N/A | >40   | >40   | - | 0.994 | - | / | Consistent<br>Negative | SZII |
| P024 | Oropharyngeal swab | Asymptomatic   | Close contacts     | BG | N/A | >40   | >40   | - | 0.997 | - | / | Consistent<br>Negative | SZII |
| P025 | Oropharyngeal swab | Asymptomatic   | Close contacts     | BG | N/A | >40   | >40   | - | 0.996 | - | / | Consistent<br>Negative | SZII |
| P026 | Oropharyngeal swab | Fever, cough   | COVID-19 suspected | BG | N/A | 18.00 | 20.00 | + | 1.447 | + | / | Consistent<br>Positive | SZII |
| P027 | Oropharyngeal swab | Fever, cough   | COVID-19 suspected | BG | N/A | 26.00 | 27.50 | + | 1.290 | + | / | Consistent<br>Positive | SZII |
| P028 | Oropharyngeal swab | Fever          | COVID-19 suspected | BG | N/A | >40   | 36.09 | + | 1.386 | + | + | Uncertain<br>Positive  | SZII |
| P029 | Oropharyngeal swab | Fever          | COVID-19 suspected | BG | N/A | >40   | 35.88 | + | 1.546 | + | + | Uncertain<br>Positive  | SZII |
| P030 | Oropharyngeal swab | Asymptomatic   | Close contacts     | BG | N/A | >40   | >40   | - | 1.015 | - | - | Consistent<br>Negative | SZII |
| P031 | Oropharyngeal swab | Asymptomatic   | Close contacts     | BG | N/A | >40   | >40   | - | 1.017 | - | - | Consistent<br>Negative | SZII |
| P032 | Oropharyngeal swab | Fever          | COVID-19 suspected | BG | N/A | >40   | 37.98 | + | 1.210 | + | + | Uncertain<br>Positive  | SZII |
| P033 | Oropharyngeal swab | Fever, Dyspnea | Pneumonia          | BG | N/A | >40   | >40   | - | 1.024 | - | - | Consistent<br>Negative | SZII |
| P034 | Anal swabs         | Fever, Dyspnea | Pneumonia          | BG | N/A | >40   | >40   | - | 1.012 | - | - | Consistent<br>Negative | SZII |

|      |                    |                |                    |    |     |     |     |   |       |   |   |                     |      |
|------|--------------------|----------------|--------------------|----|-----|-----|-----|---|-------|---|---|---------------------|------|
| P035 | Oropharyngeal swab | Fever, Dyspnea | Pneumonia          | BG | N/A | >40 | >40 | - | 1.015 | - | - | Consistent          | SZII |
| P036 | Anal swabs         | Fever, Dyspnea | Pneumonia          | BG | N/A | >40 | >40 | - | 1.008 | - | / | Negative Consistent | SZII |
| P037 | Oropharyngeal swab | Fever, Dyspnea | Pneumonia          | BG | N/A | >40 | >40 | - | 1.016 | - | - | Negative Consistent | SZII |
| P038 | Anal swabs         | Fever, Dyspnea | Pneumonia          | BG | N/A | >40 | >40 | - | 1.022 | - | - | Negative Consistent | SZII |
| P039 | Oropharyngeal swab | Fever, Dyspnea | Pneumonia          | BG | N/A | >40 | >40 | - | 1.014 | - | - | Negative Consistent | SZII |
| P040 | Anal swabs         | Fever, Dyspnea | Pneumonia          | BG | N/A | >40 | >40 | - | 1.014 | - | - | Negative Consistent | SZII |
| P041 | Oropharyngeal swab | Fever          | COVID-19 suspected | BG | N/A | >40 | >40 | - | 0.994 | - | / | Negative Consistent | SZII |
| P042 | Oropharyngeal swab | Fever          | COVID-19 suspected | BG | N/A | >40 | >40 | - | 1.011 | - | / | Negative Consistent | SZII |
| P043 | Oropharyngeal swab | Fever          | COVID-19 suspected | BG | N/A | >40 | >40 | - | 1.006 | - | / | Negative Consistent | SZII |
| P044 | Oropharyngeal swab | Fever          | COVID-19 suspected | BG | N/A | >40 | >40 | - | 1.018 | - | / | Negative Consistent | SZII |
| P045 | Oropharyngeal swab | Fever          | COVID-19 suspected | BG | N/A | >40 | >40 | - | 1.000 | - | / | Negative Consistent | SZII |
| P046 | Oropharyngeal swab | Fever          | COVID-19 suspected | BG | N/A | >40 | >40 | - | 0.988 | - | / | Negative Consistent | SZII |
| P047 | Oropharyngeal swab | Fever          | COVID-19 suspected | BG | N/A | >40 | >40 | - | 1.014 | - | / | Negative Consistent | SZII |
| P048 | Oropharyngeal swab | Fever          | COVID-19 suspected | BG | N/A | >40 | >40 | - | 1.002 | - | / | Negative Consistent | SZII |
| P049 | Oropharyngeal swab | Fever          | COVID-19 suspected | BG | N/A | >40 | >40 | - | 1.010 | - | / | Negative Consistent | SZII |
| P050 | Oropharyngeal swab | Fever          | COVID-19 suspected | BG | N/A | >40 | >40 | - | 1.006 | - | / | Negative Consistent | SZII |

|      |                    |       |                    |    |     |       |     |           |       |   |   |                        |      |
|------|--------------------|-------|--------------------|----|-----|-------|-----|-----------|-------|---|---|------------------------|------|
| P051 | Oropharyngeal swab | Fever | COVID-19 suspected | BG | N/A | >40   | >40 | -         | 1.004 | - | / | Consistent<br>Negative | SZII |
| P052 | Oropharyngeal swab | Fever | COVID-19 suspected | BG | N/A | >40   | >40 | -         | 0.998 | - | / | Consistent<br>Negative | SZII |
| P053 | Oropharyngeal swab | Fever | COVID-19 suspected | BG | N/A | >40   | >40 | -         | 1.016 | - | / | Consistent<br>Negative | SZII |
| P054 | Oropharyngeal swab | Fever | COVID-19 suspected | BG | N/A | >40   | >40 | -         | 0.998 | - | / | Consistent<br>Negative | SZII |
| P055 | Oropharyngeal swab | Fever | COVID-19 suspected | BG | N/A | 39.47 | >40 | Uncertain | 0.995 | - | - | Uncertain<br>Negative  | SZII |
| P056 | Oropharyngeal swab | Fever | COVID-19 suspected | BG | N/A | >40   | >40 | -         | 1.024 | - | / | Consistent<br>Negative | SZII |
| P057 | Oropharyngeal swab | Fever | COVID-19 suspected | BG | N/A | >40   | >40 | -         | 1.008 | - | / | Consistent<br>Negative | SZII |
| P058 | Oropharyngeal swab | Fever | COVID-19 suspected | BG | N/A | >40   | >40 | -         | 0.998 | - | / | Consistent<br>Negative | SZII |
| P059 | Oropharyngeal swab | Fever | COVID-19 suspected | BG | N/A | >40   | >40 | -         | 0.995 | - | / | Consistent<br>Negative | SZII |
| P060 | Oropharyngeal swab | Fever | COVID-19 suspected | BG | N/A | >40   | >40 | -         | 1.014 | - | / | Consistent<br>Negative | SZII |
| P061 | Oropharyngeal swab | Fever | COVID-19 suspected | BG | N/A | >40   | >40 | -         | 1.010 | - | / | Consistent<br>Negative | SZII |
| P062 | Oropharyngeal swab | Fever | COVID-19 suspected | BG | N/A | >40   | >40 | -         | 1.008 | - | / | Consistent<br>Negative | SZII |
| P063 | Oropharyngeal swab | Fever | COVID-19 suspected | BG | N/A | >40   | >40 | -         | 1.007 | - | / | Consistent<br>Negative | SZII |
| P064 | Oropharyngeal swab | Fever | COVID-19 suspected | BG | N/A | >40   | >40 | -         | 1.005 | - | / | Consistent<br>Negative | SZII |
| P065 | Oropharyngeal swab | Fever | COVID-19 suspected | BG | N/A | >40   | >40 | -         | 1.016 | - | / | Consistent<br>Negative | SZII |
| P066 | Oropharyngeal swab | Fever | COVID-19 suspected | BG | N/A | >40   | >40 | -         | 1.001 | - | / | Consistent<br>Negative | SZII |



|      |                    |       |                    |    |     |     |     |   |       |   |   |                                      |      |
|------|--------------------|-------|--------------------|----|-----|-----|-----|---|-------|---|---|--------------------------------------|------|
| P067 | Oropharyngeal swab | Fever | COVID-19 suspected | BG | N/A | >40 | >40 | - | 1.001 | - | / | Consistent<br>Negative<br>Consistent | SZII |
| P068 | Oropharyngeal swab | Fever | COVID-19 suspected | BG | N/A | >40 | >40 | - | 1.009 | - | / | Consistent<br>Negative<br>Consistent | SZII |
| P069 | Oropharyngeal swab | Fever | COVID-19 suspected | BG | N/A | >40 | >40 | - | 1.005 | - | / | Consistent<br>Negative<br>Consistent | SZII |
| P070 | Oropharyngeal swab | Fever | COVID-19 suspected | BG | N/A | >40 | >40 | - | 1.009 | - | / | Consistent<br>Negative<br>Consistent | SZII |
| P071 | Oropharyngeal swab | Fever | COVID-19 suspected | BG | N/A | >40 | >40 | - | 1.003 | - | / | Consistent<br>Negative<br>Consistent | SZII |
| P072 | Oropharyngeal swab | Fever | COVID-19 suspected | BG | N/A | >40 | >40 | - | 0.952 | - | / | Consistent<br>Negative<br>Consistent | SZII |
| P073 | Oropharyngeal swab | Fever | COVID-19 suspected | BG | N/A | >40 | >40 | - | 1.009 | - | / | Consistent<br>Negative<br>Consistent | SZII |
| P074 | Oropharyngeal swab | Fever | COVID-19 suspected | BG | N/A | >40 | >40 | - | 1.004 | - | / | Consistent<br>Negative<br>Consistent | SZII |
| P075 | Oropharyngeal swab | Fever | COVID-19 suspected | BG | N/A | >40 | >40 | - | 0.992 | - | / | Consistent<br>Negative<br>Consistent | SZII |
| P076 | Oropharyngeal swab | Fever | COVID-19 suspected | BG | N/A | >40 | >40 | - | 0.992 | - | / | Consistent<br>Negative<br>Consistent | SZII |
| P077 | Oropharyngeal swab | Fever | COVID-19 suspected | BG | N/A | >40 | >40 | - | 1.000 | - | / | Consistent<br>Negative<br>Consistent | SZII |
| P078 | Oropharyngeal swab | Fever | COVID-19 suspected | BG | N/A | >40 | >40 | - | 0.996 | - | / | Consistent<br>Negative<br>Consistent | SZII |
| P079 | Oropharyngeal swab | Fever | COVID-19 suspected | BG | N/A | >40 | >40 | - | 0.995 | - | / | Consistent<br>Negative<br>Consistent | SZII |
| P080 | Oropharyngeal swab | Fever | COVID-19 suspected | BG | N/A | >40 | >40 | - | 0.987 | - | / | Consistent<br>Negative<br>Consistent | SZII |
| P081 | Oropharyngeal swab | Fever | COVID-19 suspected | BG | N/A | >40 | >40 | - | 1.009 | - | / | Consistent<br>Negative<br>Consistent | SZII |
| P082 | Oropharyngeal swab | Fever | COVID-19 suspected | BG | N/A | >40 | >40 | - | 1.010 | - | / | Consistent<br>Negative               | SZII |

|      |                    |       |                    |    |     |       |     |           |       |   |   |                                      |      |
|------|--------------------|-------|--------------------|----|-----|-------|-----|-----------|-------|---|---|--------------------------------------|------|
| P083 | Oropharyngeal swab | Fever | COVID-19 suspected | BG | N/A | >40   | >40 | -         | 0.999 | - | / | Consistent<br>Negative<br>Consistent | SZII |
| P084 | Oropharyngeal swab | Fever | COVID-19 suspected | BG | N/A | >40   | >40 | -         | 0.983 | - | / | Consistent<br>Negative<br>Consistent | SZII |
| P085 | Oropharyngeal swab | Fever | COVID-19 suspected | BG | N/A | >40   | >40 | -         | 1.011 | - | / | Consistent<br>Negative<br>Consistent | SZII |
| P086 | Oropharyngeal swab | Fever | COVID-19 suspected | BG | N/A | >40   | >40 | -         | 0.986 | - | / | Consistent<br>Negative<br>Consistent | SZII |
| P087 | Oropharyngeal swab | Fever | COVID-19 suspected | BG | N/A | >40   | >40 | -         | 0.990 | - | / | Consistent<br>Negative<br>Consistent | SZII |
| P088 | Oropharyngeal swab | Fever | COVID-19 suspected | BG | N/A | >40   | >40 | -         | 1.002 | - | / | Consistent<br>Negative<br>Consistent | SZII |
| P089 | Oropharyngeal swab | Fever | COVID-19 suspected | BG | N/A | >40   | >40 | -         | 1.002 | - | / | Consistent<br>Negative<br>Consistent | SZII |
| P090 | Oropharyngeal swab | Fever | COVID-19 suspected | BG | N/A | >40   | >40 | -         | 1.001 | - | / | Consistent<br>Negative<br>Consistent | SZII |
| P091 | Oropharyngeal swab | Fever | COVID-19 suspected | BG | N/A | 39.70 | >40 | Uncertain | 0.992 | - | - | Uncertain<br>Negative                | SZII |
| P092 | Oropharyngeal swab | Fever | COVID-19 suspected | BG | N/A | >40   | >40 | -         | 1.001 | - | / | Consistent<br>Negative<br>Consistent | SZII |
| P093 | Oropharyngeal swab | Fever | COVID-19 suspected | BG | N/A | >40   | >40 | -         | 1.004 | - | / | Consistent<br>Negative<br>Consistent | SZII |
| P094 | Oropharyngeal swab | Fever | COVID-19 suspected | BG | N/A | >40   | >40 | -         | 0.999 | - | / | Consistent<br>Negative<br>Consistent | SZII |
| P095 | Oropharyngeal swab | Fever | COVID-19 suspected | BG | N/A | >40   | >40 | -         | 1.008 | - | / | Consistent<br>Negative<br>Consistent | SZII |
| P096 | Oropharyngeal swab | Fever | COVID-19 suspected | BG | N/A | >40   | >40 | -         | 1.006 | - | / | Consistent<br>Negative<br>Consistent | SZII |
| P097 | Oropharyngeal swab | Fever | COVID-19 suspected | BG | N/A | >40   | >40 | -         | 1.003 | - | / | Consistent<br>Negative<br>Consistent | SZII |
| P098 | Oropharyngeal swab | Fever | COVID-19 suspected | BG | N/A | >40   | >40 | -         | 1.010 | - | / | Consistent<br>Negative               | SZII |

|      |                    |       |                    |    |     |       |     |           |       |   |   |                        |      |
|------|--------------------|-------|--------------------|----|-----|-------|-----|-----------|-------|---|---|------------------------|------|
| P099 | Oropharyngeal swab | Fever | COVID-19 suspected | BG | N/A | >40   | >40 | -         | 1.001 | - | / | Consistent<br>Negative | SZII |
| P100 | Oropharyngeal swab | Fever | COVID-19 suspected | BG | N/A | >40   | >40 | -         | 1.006 | - | / | Consistent<br>Negative | SZII |
| P101 | Oropharyngeal swab | Fever | COVID-19 suspected | BG | N/A | >40   | >40 | -         | 0.997 | - | / | Consistent<br>Negative | SZII |
| P102 | Oropharyngeal swab | Fever | COVID-19 suspected | BG | N/A | >40   | >40 | -         | 1.004 | - | / | Consistent<br>Negative | SZII |
| P103 | Oropharyngeal swab | Fever | COVID-19 suspected | BG | N/A | 40.56 | >40 | Uncertain | 0.996 | - | - | Uncertain<br>Negative  | SZII |
| P104 | Oropharyngeal swab | Fever | COVID-19 suspected | BG | N/A | >40   | >40 | -         | 0.988 | - | / | Consistent<br>Negative | SZII |
| P105 | Oropharyngeal swab | Fever | COVID-19 suspected | BG | N/A | >40   | >40 | -         | 1.001 | - | / | Consistent<br>Negative | SZII |
| P106 | Oropharyngeal swab | Fever | COVID-19 suspected | BG | N/A | >40   | >40 | -         | 1.002 | - | / | Consistent<br>Negative | SZII |
| P107 | Oropharyngeal swab | Fever | COVID-19 suspected | BG | N/A | >40   | >40 | -         | 1.000 | - | / | Consistent<br>Negative | SZII |
| P108 | Oropharyngeal swab | Fever | COVID-19 suspected | BG | N/A | >40   | >40 | -         | 1.008 | - | / | Consistent<br>Negative | SZII |
| P109 | Oropharyngeal swab | Fever | COVID-19 suspected | BG | N/A | >40   | >40 | -         | 1.005 | - | / | Consistent<br>Negative | SZII |
| P110 | Oropharyngeal swab | Fever | COVID-19 suspected | BG | N/A | >40   | >40 | -         | 1.031 | - | / | Consistent<br>Negative | SZII |
| P111 | Oropharyngeal swab | Fever | COVID-19 suspected | BG | N/A | >40   | >40 | -         | 1.004 | - | / | Consistent<br>Negative | SZII |
| P112 | Oropharyngeal swab | Fever | COVID-19 suspected | BG | N/A | >40   | >40 | -         | 1.008 | - | / | Consistent<br>Negative | SZII |
| P113 | Oropharyngeal swab | Fever | COVID-19 suspected | BG | N/A | >40   | >40 | -         | 1.013 | - | / | Consistent<br>Negative | SZII |
| P114 | Oropharyngeal swab | Fever | COVID-19 suspected | BG | N/A | >40   | >40 | -         | 0.994 | - | / | Consistent<br>Negative | SZII |

|      |                    |       |                    |    |     |     |     |   |       |   |   |                        |      |
|------|--------------------|-------|--------------------|----|-----|-----|-----|---|-------|---|---|------------------------|------|
| P115 | Oropharyngeal swab | Fever | COVID-19 suspected | BG | N/A | >40 | >40 | - | 0.998 | - | / | Consistent<br>Negative | SZII |
| P116 | Oropharyngeal swab | Fever | COVID-19 suspected | BG | N/A | >40 | >40 | - | 1.000 | - | / | Consistent<br>Negative | SZII |
| P117 | Oropharyngeal swab | Fever | COVID-19 suspected | BG | N/A | >40 | >40 | - | 1.000 | - | / | Consistent<br>Negative | SZII |
| P118 | Oropharyngeal swab | Fever | COVID-19 suspected | BG | N/A | >40 | >40 | - | 1.005 | - | / | Consistent<br>Negative | SZII |
| P119 | Oropharyngeal swab | Fever | COVID-19 suspected | BG | N/A | >40 | >40 | - | 0.992 | - | / | Consistent<br>Negative | SZII |
| P120 | Oropharyngeal swab | Fever | COVID-19 suspected | BG | N/A | >40 | >40 | - | 0.981 | - | / | Consistent<br>Negative | SZII |
| P121 | Oropharyngeal swab | Fever | COVID-19 suspected | BG | N/A | >40 | >40 | - | 1.015 | - | / | Consistent<br>Negative | SZII |
| P122 | Oropharyngeal swab | Fever | COVID-19 suspected | BG | N/A | >40 | >40 | - | 1.001 | - | / | Consistent<br>Negative | SZII |
| P123 | Oropharyngeal swab | Fever | COVID-19 suspected | BG | N/A | >40 | >40 | - | 1.001 | - | / | Consistent<br>Negative | SZII |
| P124 | Oropharyngeal swab | Fever | COVID-19 suspected | BG | N/A | >40 | >40 | - | 1.003 | - | / | Consistent<br>Negative | SZII |
| P125 | Oropharyngeal swab | Fever | COVID-19 suspected | BG | N/A | >40 | >40 | - | 1.000 | - | / | Consistent<br>Negative | SZII |
| P126 | Oropharyngeal swab | Fever | COVID-19 suspected | BG | N/A | >40 | >40 | - | 0.987 | - | / | Consistent<br>Negative | SZII |
| P127 | Oropharyngeal swab | Fever | COVID-19 suspected | BG | N/A | >40 | >40 | - | 0.994 | - | / | Consistent<br>Negative | SZII |
| P128 | Oropharyngeal swab | Fever | COVID-19 suspected | BG | N/A | >40 | >40 | - | 0.989 | - | / | Consistent<br>Negative | SZII |
| P129 | Oropharyngeal swab | Fever | COVID-19 suspected | BG | N/A | >40 | >40 | - | 0.978 | - | / | Consistent<br>Negative | SZII |
| P130 | Oropharyngeal swab | Fever | COVID-19 suspected | BG | N/A | >40 | >40 | - | 0.991 | - | / | Consistent<br>Negative | SZII |

|         |                             |                                |                            |    |     |       |       |           |       |   |   |                     |      |
|---------|-----------------------------|--------------------------------|----------------------------|----|-----|-------|-------|-----------|-------|---|---|---------------------|------|
| P131    | Oropharyngeal swab          | Fever                          | COVID-19 suspected         | BG | N/A | >40   | >40   | -         | 1.001 | - | / | Consistent Negative | SZII |
| P132    | Oropharyngeal swab          | Fever                          | COVID-19 suspected         | BG | N/A | >40   | >40   | -         | 1.001 | - | / | Consistent Negative | SZII |
| P133    | Oropharyngeal swab          | Fever                          | COVID-19 suspected         | BG | N/A | >40   | >40   | -         | 0.998 | - | / | Consistent Negative | SZII |
| P134    | Oropharyngeal swab          | Fever                          | COVID-19 suspected         | BG | N/A | >40   | >40   | -         | 0.995 | - | / | Consistent Negative | SZII |
| P135    | Oropharyngeal swab          | Fever, cough                   | COVID-19 suspected         | BG | N/A | 26.72 | 26.41 | +         | 1.502 | + | / | Consistent Positive | SZII |
| P136    | Oropharyngeal swab          | Fever, cough                   | COVID-19 suspected         | BG | N/A | 24.38 | 24.02 | +         | 1.447 | + | / | Consistent Positive | SZII |
| P137    | Oropharyngeal swab          | Fever, cough                   | COVID-19 suspected         | BG | N/A | 38.87 | 36.28 | Uncertain | 1.581 | + | / | Uncertain Positive  | SZII |
| P138    | Oropharyngeal swab          | Fever, cough                   | COVID-19 suspected         | BG | N/A | 39.22 | 38.21 | Uncertain | 1.609 | + | / | Uncertain Positive  | SZII |
| P139    | Oropharyngeal swab          | Fever, cough                   | COVID-19 suspected         | BG | N/A | 36.26 | 33.90 | +         | 1.646 | + | / | Consistent Positive | SZII |
| P140-1  | Throat swab                 | No common respiratory symptoms | Came from Wuhan, suspected | BG | N/A | >40   | >40   | -         | 0.992 | - | / | Consistent Negative | DF   |
| P140-2  | Nasopharyngeal swab (Left)  | No common respiratory symptoms | Came from Wuhan, suspected | BG | N/A | >40   | >40   | -         | 1.003 | - | / | Consistent Negative | DF   |
| P140-3  | Nasopharyngeal swab (Right) | No common respiratory symptoms | Came from Wuhan, suspected | BG | N/A | 35.96 | 37.24 | +         | 1.430 | + | + | Consistent Positive | DF   |
| P140-4  | Blood serum                 | No common respiratory symptoms | Came from Wuhan, suspected | BG | N/A | >40   | >40   | -         | 1.002 | - | / | Consistent Negative | DF   |
| P140-5  | Nasopharyngeal swab         | No common respiratory symptoms | Came from Wuhan, suspected | BG | N/A | >40   | >40   | -         | 1.006 | - | / | Consistent Negative | DF   |
| P140-6  | Nasol swab                  | No common respiratory symptoms | Came from Wuhan, suspected | BG | N/A | >40   | >40   | -         | 1.614 | + | + | False Negative      | DF   |
| P140-7  | Nasol swab                  | No common respiratory symptoms | Came from Wuhan, suspected | BG | N/A | >40   | >40   | -         | 1.369 | + | + | False Negative      | DF   |
| P140-8  | Blood serum                 | No common respiratory symptoms | Came from Wuhan, suspected | BG | N/A | >40   | >40   | -         | 1.000 | - | / | Consistent Negative | DF   |
| P140-9  | Nasopharyngeal swab (Left)  | No common respiratory symptoms | Came from Wuhan, suspected | BG | N/A | >40   | >40   | -         | 1.004 | - | - | Consistent Negative | DF   |
| P140-10 | Nasopharyngeal swab (Right) | No common respiratory symptoms | Came from Wuhan, suspected | BG | N/A | >40   | >40   | -         | 1.004 | - | / | Consistent Negative | DF   |

|         |                     |                                |                             |    |       |       |       |           |       |   |   |                     |    |
|---------|---------------------|--------------------------------|-----------------------------|----|-------|-------|-------|-----------|-------|---|---|---------------------|----|
| P140-11 | Throat swab         | No common respiratory symptoms | Came from Wuhan, suspected  | BG | N/A   | >40   | >40   | -         | 1.002 | - | / | Consistent Negative | DF |
| P140-12 | Serum               | No common respiratory symptoms | Came from Wuhan, suspected  | BG | N/A   | >40   | >40   | -         | 1.007 | - | / | Consistent Negative | DF |
| P140-13 | Plasma              | No common respiratory symptoms | Came from Wuhan, suspected  | BG | N/A   | >40   | >40   | -         | 1.005 | - | / | Consistent Negative | DF |
| P140-14 | Fecal               | No common respiratory symptoms | Came from Wuhan, suspected  | BG | N/A   | >40   | >40   | -         | 1.002 | - | / | Consistent Negative | DF |
| P141    | Nasopharyngeal swab | Fever                          | COVID-19 suspected          | LR | 32.68 | 33.98 | 33.42 | +         | 1.673 | + | + | Consistent Positive | RJ |
| P142    | Nasopharyngeal swab | Fever                          | COVID-19 suspected          | LR | 35.76 | 37.54 | 36.28 | +         | 1.391 | + | + | Consistent Positive | RJ |
| P143    | Nasopharyngeal swab | Fever, Chest pain              | COVID-19 suspected          | LR | >45   | >45   | >45   | -         | 1.245 | + | + | False Negative      | RJ |
| P144    | Nasopharyngeal swab | Cough                          | Upper respiratory infection | LR | 41.92 | >45   | >45   | Uncertain | 1.022 | - | - | Uncertain Negative  | RJ |
| P145    | Nasopharyngeal swab | Fever                          | Upper respiratory infection | LR | 41.42 | >45   | >45   | Uncertain | 0.897 | - | - | Uncertain Negative  | RJ |
| P146    | Nasopharyngeal swab | Chest pain                     | COVID-19 suspected          | LR | 42.62 | >45   | >45   | Uncertain | 0.898 | - | - | Uncertain Negative  | RJ |
| P147    | Nasopharyngeal swab | Cough                          | Upper respiratory infection | LR | 41.34 | >45   | >45   | Uncertain | 0.730 | - | - | Uncertain Negative  | RJ |
| P148    | Nasopharyngeal swab | Fever                          | COVID-19 suspected          | LR | 42.89 | >45   | >45   | Uncertain | 0.812 | - | - | Uncertain Negative  | RJ |
| P149    | Nasopharyngeal swab | Dyspnea                        | Pneumonia                   | LR | 42.65 | >45   | >45   | Uncertain | 0.768 | - | - | Uncertain Negative  | RJ |
| P150    | Nasopharyngeal swab | Fever                          | COVID-19 suspected          | LR | 41.82 | >45   | >45   | Uncertain | 0.991 | - | - | Uncertain Negative  | RJ |
| P151    | Nasopharyngeal swab | Asymptomatic                   | Upper respiratory infection | LR | 42.14 | >45   | >45   | Uncertain | 0.960 | - | - | Uncertain Negative  | RJ |
| P152    | Nasopharyngeal swab | Dyspnea                        | COVID-19 suspected          | LR | 41.74 | >45   | >45   | Uncertain | 0.960 | - | - | Uncertain Negative  | RJ |
| P153    | Nasopharyngeal swab | Fever                          | Upper respiratory infection | LR | 41.84 | >45   | >45   | Uncertain | 0.897 | - | - | Uncertain Negative  | RJ |
| P154    | Nasopharyngeal swab | Chest pain                     | Heart failure               | LR | 42.04 | >45   | >45   | Uncertain | 0.991 | - | - | Uncertain Negative  | RJ |
| P155    | Nasopharyngeal swab | cough                          | Pneumonia                   | LR | 41.12 | >45   | >45   | Uncertain | 0.898 | - | - | Uncertain Negative  | RJ |
| P156    | Nasopharyngeal swab | Fever                          | Pneumonia                   | LR | >45   | >45   | >45   | -         | 0.936 | - | / | Consistent Negative | RJ |
| P157    | Nasopharyngeal swab | Cough                          | Upper respiratory infection | LR | >45   | >45   | >45   | -         | 0.894 | - | / | Consistent Negative | RJ |

|      |                     |              |                             |    |       |     |     |   |       |   |   |                     |    |
|------|---------------------|--------------|-----------------------------|----|-------|-----|-----|---|-------|---|---|---------------------|----|
| P158 | Nasopharyngeal swab | Fever        | COVID-19 suspected          | LR | >45   | >45 | >45 | - | 0.970 | - | / | Consistent          | RJ |
| P159 | Nasopharyngeal swab | Fever        | COVID-19 suspected          | LR | 44.62 | >45 | >45 | - | 0.870 | - | / | Negative Consistent | RJ |
| P160 | Nasopharyngeal swab | Dyspnea      | Diabetes                    | LR | >45   | >45 | >45 | - | 0.817 | - | / | Negative Consistent | RJ |
| P161 | Nasopharyngeal swab | Cough        | Upper respiratory infection | LR | >45   | >45 | >45 | - | 0.804 | - | / | Negative Consistent | RJ |
| P162 | Nasopharyngeal swab | Fever        | Diabetes                    | LR | >45   | >45 | >45 | - | 0.859 | - | / | Negative Consistent | RJ |
| P163 | Nasopharyngeal swab | Dyspnea      | Upper respiratory infection | LR | >45   | >45 | >45 | - | 0.815 | - | / | Negative Consistent | RJ |
| P164 | Nasopharyngeal swab | Fever        | Upper respiratory infection | LR | >45   | >45 | >45 | - | 0.871 | - | / | Negative Consistent | RJ |
| P165 | Nasopharyngeal swab | Cough        | Diabetes                    | LR | >45   | >45 | >45 | - | 0.802 | - | / | Negative Consistent | RJ |
| P166 | Nasopharyngeal swab | Cough        | Diabetes                    | LR | >45   | >45 | >45 | - | 0.990 | - | / | Negative Consistent | RJ |
| P167 | Nasopharyngeal swab | Fever        | Upper respiratory infection | LR | >45   | >45 | >45 | - | 0.817 | - | / | Negative Consistent | RJ |
| P168 | Nasopharyngeal swab | Fever        | Diabetes                    | LR | >45   | >45 | >45 | - | 0.760 | - | / | Negative Consistent | RJ |
| P169 | Nasopharyngeal swab | Dyspnea      | Upper respiratory infection | LR | >45   | >45 | >45 | - | 0.802 | - | / | Negative Consistent | RJ |
| P170 | Nasopharyngeal swab | Asymptomatic | Close contacts              | LR | >45   | >45 | >45 | - | 0.636 | - | / | Negative Consistent | RJ |
| P171 | Nasopharyngeal swab | Fever        | Upper respiratory infection | LR | >45   | >45 | >45 | - | 0.758 | - | / | Negative Consistent | RJ |
| P172 | Nasopharyngeal swab | Fever        | Upper respiratory infection | LR | 43.12 | >45 | >45 | - | 0.931 | - | / | Negative Consistent | RJ |
| P173 | Nasopharyngeal swab | Chest pain   | Pneumonia                   | LR | >45   | >45 | >45 | - | 0.758 | - | / | Negative Consistent | RJ |

|      |                     |              |                             |    |       |     |     |   |       |   |   |                     |    |
|------|---------------------|--------------|-----------------------------|----|-------|-----|-----|---|-------|---|---|---------------------|----|
| P174 | Nasopharyngeal swab | Fever        | Diabetes                    | LR | >45   | >45 | >45 | - | 0.951 | - | / | Consistent          | RJ |
| P175 | Nasopharyngeal swab | Cough        | Upper respiratory infection | LR | >45   | >45 | >45 | - | 0.974 | - | / | Negative Consistent | RJ |
| P176 | Nasopharyngeal swab | Chest pain   | Pneumonia                   | LR | >45   | >45 | >45 | - | 0.683 | - | / | Negative Consistent | RJ |
| P177 | Nasopharyngeal swab | Dyspnea      | Upper respiratory infection | LR | 43.65 | >45 | >45 | - | 0.959 | - | / | Negative Consistent | RJ |
| P178 | Nasopharyngeal swab | Cough        | Upper respiratory infection | LR | >45   | >45 | >45 | - | 0.926 | - | / | Negative Consistent | RJ |
| P179 | Nasopharyngeal swab | Fever        | COVID-19 suspected          | LR | 44.12 | >45 | >45 | - | 0.761 | - | / | Negative Consistent | RJ |
| P180 | Nasopharyngeal swab | Fever        | COVID-19 suspected          | LR | >45   | >45 | >45 | - | 0.685 | - | / | Negative Consistent | RJ |
| P181 | Nasopharyngeal swab | Fever        | Upper respiratory infection | LR | >45   | >45 | >45 | - | 0.815 | - | / | Negative Consistent | RJ |
| P182 | Nasopharyngeal swab | Asymptomatic | Close contacts              | LR | >45   | >45 | >45 | - | 0.943 | - | / | Negative Consistent | RJ |
| P183 | Nasopharyngeal swab | Dyspnea      | Pneumonia                   | LR | >45   | >45 | >45 | - | 0.850 | - | / | Negative Consistent | RJ |
| P184 | Nasopharyngeal swab | Cough        | Upper respiratory infection | LR | >45   | >45 | >45 | - | 0.758 | - | / | Negative Consistent | RJ |
| P185 | Nasopharyngeal swab | Fever        | Upper respiratory infection | LR | >45   | >45 | >45 | - | 0.582 | - | / | Negative Consistent | RJ |
| P186 | Nasopharyngeal swab | Cough        | Upper respiratory infection | LR | >45   | >45 | >45 | - | 0.655 | - | / | Negative Consistent | RJ |
| P187 | Nasopharyngeal swab | Cough        | Upper respiratory infection | LR | >45   | >45 | >45 | - | 0.936 | - | / | Negative Consistent | RJ |
| P188 | Nasopharyngeal swab | Fever        | Pneumonia                   | LR | >45   | >45 | >45 | - | 0.647 | - | / | Negative Consistent | RJ |
| P189 | Nasopharyngeal swab | Fever        | Upper respiratory infection | LR | >45   | >45 | >45 | - | 0.699 | - | / | Negative Consistent | RJ |



|      |                     |              |                             |    |     |     |     |   |       |   |   |                     |    |
|------|---------------------|--------------|-----------------------------|----|-----|-----|-----|---|-------|---|---|---------------------|----|
| P190 | Nasopharyngeal swab | Fever        | Pneumonia                   | LR | >45 | >45 | >45 | - | 0.994 | - | / | Consistent          | RJ |
| P191 | Nasopharyngeal swab | Fever        | Upper respiratory infection | LR | >45 | >45 | >45 | - | 0.764 | - | / | Negative Consistent | RJ |
| P192 | Nasopharyngeal swab | Fever        | Upper respiratory infection | LR | >45 | >45 | >45 | - | 0.626 | - | / | Negative Consistent | RJ |
| P193 | Nasopharyngeal swab | Cough        | Diabetes                    | LR | >45 | >45 | >45 | - | 0.800 | - | / | Negative Consistent | RJ |
| P194 | Nasopharyngeal swab | Fever        | Upper respiratory infection | LR | >45 | >45 | >45 | - | 0.674 | - | / | Negative Consistent | RJ |
| P195 | Nasopharyngeal swab | Dyspnea      | Pneumonia                   | LR | >45 | >45 | >45 | - | 0.589 | - | / | Negative Consistent | RJ |
| P196 | Nasopharyngeal swab | Fever        | Upper respiratory infection | LR | >45 | >45 | >45 | - | 0.580 | - | / | Negative Consistent | RJ |
| P197 | Nasopharyngeal swab | Fever        | Upper respiratory infection | LR | >45 | >45 | >45 | - | 0.630 | - | / | Negative Consistent | RJ |
| P198 | Nasopharyngeal swab | Asymptomatic | Close contacts              | LR | >45 | >45 | >45 | - | 0.846 | - | / | Negative Consistent | RJ |
| P199 | Nasopharyngeal swab | Fever        | Upper respiratory infection | LR | >45 | >45 | >45 | - | 0.644 | - | / | Negative Consistent | RJ |
| P200 | Nasopharyngeal swab | Fever        | Upper respiratory infection | LR | >45 | >45 | >45 | - | 0.760 | - | / | Negative Consistent | RJ |
| P201 | Nasopharyngeal swab | Cough        | Pneumonia                   | LR | >45 | >45 | >45 | - | 0.949 | - | / | Negative Consistent | RJ |
| P202 | Nasopharyngeal swab | Fever        | Upper respiratory infection | LR | >45 | >45 | >45 | - | 0.905 | - | / | Negative Consistent | RJ |
| P203 | Nasopharyngeal swab | Fever        | Pneumonia                   | LR | >45 | >45 | >45 | - | 0.799 | - | / | Negative Consistent | RJ |
| P204 | Nasopharyngeal swab | Fever        | Pneumonia                   | LR | >45 | >45 | >45 | - | 0.905 | - | / | Negative Consistent | RJ |
| P205 | Nasopharyngeal swab | Asymptomatic | Close contacts              | LR | >45 | >45 | >45 | - | 0.868 | - | / | Negative Consistent | RJ |

|      |                     |              |                             |    |     |     |     |   |       |   |   |                     |    |
|------|---------------------|--------------|-----------------------------|----|-----|-----|-----|---|-------|---|---|---------------------|----|
| P206 | Nasopharyngeal swab | Fever        | Upper respiratory infection | LR | >45 | >45 | >45 | - | 0.674 | - | / | Consistent          | RJ |
| P207 | Nasopharyngeal swab | Asymptomatic | Close contacts              | LR | >45 | >45 | >45 | - | 0.936 | - | / | Negative Consistent | RJ |
| P208 | Nasopharyngeal swab | Chest pain   | Pneumonia                   | LR | >45 | >45 | >45 | - | 0.802 | - | / | Negative Consistent | RJ |
| P209 | Nasopharyngeal swab | Fever        | Upper respiratory infection | LR | >45 | >45 | >45 | - | 0.630 | - | / | Negative Consistent | RJ |
| P210 | Nasopharyngeal swab | Fever        | COVID-19 suspected          | LR | >45 | >45 | >45 | - | 0.737 | - | / | Negative Consistent | RJ |
| P211 | Nasopharyngeal swab | Fever        | COVID-19 suspected          | LR | >45 | >45 | >45 | - | 0.905 | - | / | Negative Consistent | RJ |
| P212 | Nasopharyngeal swab | Fever        | Upper respiratory infection | LR | >45 | >45 | >45 | - | 0.999 | - | / | Negative Consistent | RJ |
| P213 | Nasopharyngeal swab | Fever        | Upper respiratory infection | LR | >45 | >45 | >45 | - | 0.942 | - | / | Negative Consistent | RJ |
| P214 | Nasopharyngeal swab | Cough        | Diabetes                    | LR | >45 | >45 | >45 | - | 0.848 | - | / | Negative Consistent | RJ |
| P215 | Nasopharyngeal swab | Cough        | Upper respiratory infection | LR | >45 | >45 | >45 | - | 0.772 | - | / | Negative Consistent | RJ |
| P216 | Nasopharyngeal swab | Cough        | Upper respiratory infection | LR | >45 | >45 | >45 | - | 0.948 | - | / | Negative Consistent | RJ |
| P217 | Nasopharyngeal swab | Fever        | Upper respiratory infection | LR | >45 | >45 | >45 | - | 0.848 | - | / | Negative Consistent | RJ |
| P218 | Nasopharyngeal swab | Fever        | Diabetes                    | LR | >45 | >45 | >45 | - | 0.816 | - | / | Negative Consistent | RJ |
| P219 | Nasopharyngeal swab | Fever        | Upper respiratory infection | LR | >45 | >45 | >45 | - | 0.759 | - | / | Negative Consistent | RJ |
| P220 | Nasopharyngeal swab | Fever        | COVID-19 suspected          | LR | >45 | >45 | >45 | - | 0.825 | - | / | Negative Consistent | RJ |
| P221 | Nasopharyngeal swab | Chest pain   | Heart failure               | LR | >45 | >45 | >45 | - | 0.807 | - | / | Negative Consistent | RJ |

|      |                     |              |                             |    |       |     |     |   |       |   |   |                     |    |
|------|---------------------|--------------|-----------------------------|----|-------|-----|-----|---|-------|---|---|---------------------|----|
| P222 | Nasopharyngeal swab | Fever        | Upper respiratory infection | LR | >45   | >45 | >45 | - | 0.654 | - | / | Consistent          | RJ |
| P223 | Nasopharyngeal swab | Asymptomatic | Close contacts              | LR | >45   | >45 | >45 | - | 0.931 | - | / | Negative Consistent | RJ |
| P224 | Nasopharyngeal swab | Fever        | Upper respiratory infection | LR | >45   | >45 | >45 | - | 0.973 | - | / | Negative Consistent | RJ |
| P225 | Nasopharyngeal swab | Fever        | Upper respiratory infection | LR | >45   | >45 | >45 | - | 0.985 | - | / | Negative Consistent | RJ |
| P226 | Nasopharyngeal swab | Fever        | Upper respiratory infection | LR | >45   | >45 | >45 | - | 1.027 | - | / | Negative Consistent | RJ |
| P227 | Nasopharyngeal swab | Asymptomatic | Close contacts              | LR | >45   | >45 | >45 | - | 1.011 | - | / | Negative Consistent | RJ |
| P228 | Nasopharyngeal swab | Fever        | Upper respiratory infection | LR | 44.18 | >45 | >45 | - | 1.049 | - | / | Negative Consistent | RJ |
| P229 | Nasopharyngeal swab | Fever        | Diabetes                    | LR | >45   | >45 | >45 | - | 0.970 | - | / | Negative Consistent | RJ |
| P230 | Nasopharyngeal swab | Fever        | Upper respiratory infection | LR | >45   | >45 | >45 | - | 0.921 | - | / | Negative Consistent | RJ |
| P231 | Nasopharyngeal swab | Fever        | COVID-19 suspected          | LR | >45   | >45 | >45 | - | 0.906 | - | / | Negative Consistent | RJ |
| P232 | Nasopharyngeal swab | Fever        | Upper respiratory infection | LR | >45   | >45 | >45 | - | 1.082 | - | / | Negative Consistent | RJ |
| P233 | Nasopharyngeal swab | Dyspnea      | Pneumonia                   | LR | >45   | >45 | >45 | - | 1.027 | - | / | Negative Consistent | RJ |
| P234 | Nasopharyngeal swab | Cough        | Upper respiratory infection | LR | >45   | >45 | >45 | - | 0.926 | - | / | Negative Consistent | RJ |
| P235 | Nasopharyngeal swab | Fever        | Upper respiratory infection | LR | >45   | >45 | >45 | - | 0.985 | - | / | Negative Consistent | RJ |
| P236 | Nasopharyngeal swab | Fever        | COVID-19 suspected          | LR | >45   | >45 | >45 | - | 0.985 | - | / | Negative Consistent | RJ |
| P237 | Nasopharyngeal swab | Chest pain   | Heart failure               | LR | >45   | >45 | >45 | - | 1.049 | - | / | Negative Consistent | RJ |

|      |                     |              |                             |    |     |     |     |   |       |   |   |                     |    |
|------|---------------------|--------------|-----------------------------|----|-----|-----|-----|---|-------|---|---|---------------------|----|
| P238 | Nasopharyngeal swab | Fever        | Upper respiratory infection | LR | >45 | >45 | >45 | - | 1.032 | - | / | Consistent          | RJ |
| P239 | Nasopharyngeal swab | Asymptomatic | Close contacts              | LR | >45 | >45 | >45 | - | 1.082 | - | / | Negative Consistent | RJ |
| P240 | Nasopharyngeal swab | Asymptomatic | Close contacts              | LR | >45 | >45 | >45 | - | 0.989 | - | / | Negative Consistent | RJ |
| P241 | Nasopharyngeal swab | Fever        | Upper respiratory infection | LR | >45 | >45 | >45 | - | 1.049 | - | / | Negative Consistent | RJ |
| P242 | Nasopharyngeal swab | Cough        | Upper respiratory infection | LR | >45 | >45 | >45 | - | 1.049 | - | / | Negative Consistent | RJ |
| P243 | Nasopharyngeal swab | Asymptomatic | Close contacts              | LR | >45 | >45 | >45 | - | 0.906 | - | / | Negative Consistent | RJ |
| P244 | Nasopharyngeal swab | Cough        | Upper respiratory infection | LR | >45 | >45 | >45 | - | 0.921 | - | / | Negative Consistent | RJ |
| P245 | Nasopharyngeal swab | Fever        | Upper respiratory infection | LR | >45 | >45 | >45 | - | 0.843 | - | / | Negative Consistent | RJ |
| P246 | Nasopharyngeal swab | Fever        | Upper respiratory infection | LR | >45 | >45 | >45 | - | 0.936 | - | / | Negative Consistent | RJ |
| P247 | Nasopharyngeal swab | Fever        | Diabetes                    | LR | >45 | >45 | >45 | - | 1.035 | - | / | Negative Consistent | RJ |
| P248 | Nasopharyngeal swab | Asymptomatic | Close contacts              | LR | >45 | >45 | >45 | - | 0.936 | - | / | Negative Consistent | RJ |
| P249 | Nasopharyngeal swab | Asymptomatic | Close contacts              | LR | >45 | >45 | >45 | - | 0.906 | - | / | Negative Consistent | RJ |
| P250 | Nasopharyngeal swab | Fever        | COVID-19 suspected          | LR | >45 | >45 | >45 | - | 1.066 | - | / | Negative Consistent | RJ |
| P251 | Nasopharyngeal swab | Asymptomatic | Close contacts              | LR | >45 | >45 | >45 | - | 0.950 | - | / | Negative Consistent | RJ |
| P252 | Nasopharyngeal swab | Dyspnea      | Upper respiratory infection | LR | >45 | >45 | >45 | - | 0.970 | - | / | Negative Consistent | RJ |
| P253 | Nasopharyngeal swab | Asymptomatic | Close contacts              | LR | >45 | >45 | >45 | - | 0.921 | - | / | Negative Consistent | RJ |

|      |                     |              |                             |    |       |     |     |   |       |   |   |                     |    |
|------|---------------------|--------------|-----------------------------|----|-------|-----|-----|---|-------|---|---|---------------------|----|
| P254 | Nasopharyngeal swab | Cough        | Upper respiratory infection | LR | >45   | >45 | >45 | - | 1.027 | - | / | Consistent          | RJ |
| P255 | Nasopharyngeal swab | Fever        | Upper respiratory infection | LR | >45   | >45 | >45 | - | 1.032 | - | / | Negative Consistent | RJ |
| P256 | Nasopharyngeal swab | Fever        | COVID-19 suspected          | LR | >45   | >45 | >45 | - | 0.936 | - | / | Negative Consistent | RJ |
| P257 | Nasopharyngeal swab | Asymptomatic | Close contacts              | LR | >45   | >45 | >45 | - | 0.901 | - | / | Negative Consistent | RJ |
| P258 | Nasopharyngeal swab | Fever        | Upper respiratory infection | LR | >45   | >45 | >45 | - | 0.950 | - | / | Negative Consistent | RJ |
| P259 | Nasopharyngeal swab | Asymptomatic | Close contacts              | LR | >45   | >45 | >45 | - | 1.027 | - | / | Negative Consistent | RJ |
| P260 | Nasopharyngeal swab | Cough        | Upper respiratory infection | LR | >45   | >45 | >45 | - | 1.066 | - | / | Negative Consistent | RJ |
| P261 | Nasopharyngeal swab | Fever        | Upper respiratory infection | LR | >45   | >45 | >45 | - | 0.911 | - | / | Negative Consistent | RJ |
| P262 | Nasopharyngeal swab | Asymptomatic | Close contacts              | LR | >45   | >45 | >45 | - | 0.936 | - | / | Negative Consistent | RJ |
| P263 | Nasopharyngeal swab | Asymptomatic | Close contacts              | LR | >45   | >45 | >45 | - | 0.921 | - | / | Negative Consistent | RJ |
| P264 | Nasopharyngeal swab | Cough        | Upper respiratory infection | LR | >45   | >45 | >45 | - | 1.066 | - | / | Negative Consistent | RJ |
| P265 | Nasopharyngeal swab | Asymptomatic | Close contacts              | LR | >45   | >45 | >45 | - | 0.901 | - | / | Negative Consistent | RJ |
| P266 | Nasopharyngeal swab | Fever        | Upper respiratory infection | LR | >45   | >45 | >45 | - | 0.936 | - | / | Negative Consistent | RJ |
| P267 | Nasopharyngeal swab | Asymptomatic | Close contacts              | LR | 43.65 | >45 | >45 | - | 0.936 | - | / | Negative Consistent | RJ |
| P268 | Nasopharyngeal swab | Cough        | Upper respiratory infection | LR | >45   | >45 | >45 | - | 1.027 | - | / | Negative Consistent | RJ |
| P269 | Nasopharyngeal swab | Fever        | Upper respiratory infection | LR | >45   | >45 | >45 | - | 0.921 | - | / | Negative Consistent | RJ |

|        |                     |                         |                             |     |     |       |       |           |       |   |   |                     |       |
|--------|---------------------|-------------------------|-----------------------------|-----|-----|-------|-------|-----------|-------|---|---|---------------------|-------|
| P270   | Nasopharyngeal swab | Cough                   | Upper respiratory infection | LR  | >45 | >45   | >45   | -         | 1.066 | - | / | Consistent Negative | RJ    |
| P271   | Nasopharyngeal swab | Asymptomatic            | Close contacts              | LR  | >45 | >45   | >45   | -         | 1.027 | - | / | Consistent Negative | RJ    |
| P272   | Nasopharyngeal swab | Dyspnea                 | Pneumonia                   | LR  | >45 | >45   | >45   | -         | 0.904 | - | / | Consistent Negative | RJ    |
| P273   | Nasopharyngeal swab | Cough                   | Upper respiratory infection | LR  | >45 | >45   | >45   | -         | 1.082 | - | / | Consistent Negative | RJ    |
| P274   | Nasopharyngeal swab | Fever                   | Diabetes                    | LR  | >45 | >45   | >45   | -         | 0.936 | - | / | Consistent Negative | RJ    |
| P275   | Nasopharyngeal swab | Asymptomatic            | Close contacts              | LR  | >45 | >45   | >45   | -         | 1.066 | - | / | Consistent Negative | RJ    |
| P276   | Nasopharyngeal swab | Asymptomatic            | Close contacts              | LR  | >45 | >45   | >45   | -         | 1.011 | - | / | Consistent Negative | RJ    |
| P277   | Nasopharyngeal swab | Asymptomatic            | Close contacts              | LR  | >45 | >45   | >45   | -         | 0.877 | - | / | Consistent Negative | RJ    |
| P278-1 | Nasopharyngeal swab | Asymptomatic            | Close contacts              | BGI | N/A | 36.25 | N/A   | +         | 1.068 | - | - | False Positive      | RJ    |
| P278-2 | Nasopharyngeal swab | Asymptomatic            | Close contacts              | LR  | >45 | >45   | >45   | -         | 1.068 | - | / | Consistent Negative | RJ    |
| P279-1 | Nasopharyngeal swab | Asymptomatic            | Close contacts              | BGI | N/A | 36.89 | N/A   | +         | 1.030 | - | - | False Positive      | RJ    |
| P279-2 | Nasopharyngeal swab | Asymptomatic            | Close contacts              | LR  | >45 | >45   | >45   | -         | 1.030 | - | / | Consistent Negative | RJ    |
| P280   | Oropharyngeal swab  | Fever, Cough, Headache  | COVID-19 suspected          | BG  | N/A | >40   | 34.27 | Uncertain | 1.172 | + | / | Uncertain Positive  | JNCDC |
| P281   | Fecal               | Fever, Cough, Rhinobyon | Close contacts              | BG  | N/A | 30.20 | 30.46 | +         | 1.453 | + | / | Consistent Positive | JNCDC |
| P282   | Fecal               | Fever, Cough, Rhinobyon | COVID-19 suspected          | BG  | N/A | 38.50 | >40   | -         | 1.250 | + | / | False Negative      | JNCDC |

93 Note: N/A, Detection of this gene that was not supported by the kit. "+", Positive; "-", negative; /, PCR product was not analyzed by NGS. Samples in aquamarine background stood for SENA  
94 negative but rRT-PCR positive or uncertain diagnosis. Samples in red background stood for SENA positive but rRT-PCR negative or uncertain diagnosis.
